# Supplementary material for: Palliative Gastrectomy Improves the Survival of Patients with Metastatic Early-Onset Gastric Cancer: A Retrospective Cohort Study
Source: MDPI journal article supplement (doi:10.3390/curroncol30090572), 2023-08-27
Supplement: s1 [file s1]

Supplemental Table S2: The effect of treatment modalities on overall survival and cause-specific survival.

| Treatment modalities   | Overall survival <sup>a, b</sup> |                       |                  | Cause-specific survival <sup>c, d</sup> |                       |                  |
|------------------------|----------------------------------|-----------------------|------------------|-----------------------------------------|-----------------------|------------------|
|                        | Number                           | Hazard ratio (95% CI) | P value          | Number                                  | Hazard ratio (95% CI) | P value          |
| No therapy (reference) | 47                               | reference             |                  | 47                                      | reference             |                  |
| Surgery                | 66                               | 0.192(0.127-0.290)    | <b>&lt;0.001</b> | 63                                      | 0.193(0.126-0.295)    | <b>&lt;0.001</b> |
| Radiation              | 13                               | 0.897(0.450-1.784)    | 0.756            | 13                                      | 0.718(0.367-1.406)    | 0.334            |
| Chemotherapy           | 182                              | 0.371(0.264-0.521)    | <b>&lt;0.001</b> | 175                                     | 0.380(0.269-0.536)    | <b>&lt;0.001</b> |
| Surgery + radiation    | 7                                | 0.292(0.128-0.668)    | 0.004            | 7                                       | 0.292(0.127-0.671)    | <b>0.004</b>     |
| Surgery + chemotherapy | 162                              | 0.192(0.134-0.274)    | <b>&lt;0.001</b> | 159                                     | 0.194(0.135-0.280)    | <b>&lt;0.001</b> |
| Chemoradiation         | 56                               | 0.282(0.183-0.436)    | <b>&lt;0.001</b> | 54                                      | 0.298(0.192-0.464)    | <b>&lt;0.001</b> |
| Trimodality            | 63                               | 0.207(0.137-0.315)    | <b>&lt;0.001</b> | 62                                      | 0.218(0.143-0.332)    | <b>&lt;0.001</b> |

P values in bold indicate <0.05. <sup>a</sup> Confounding factors (including year of diagnosis, primary site, histology, T stage, metastasis to the liver, metastasis to the lung, metastasis to the bone, metastasis to the brain) were adjusted in multivariable Cox proportional hazards regression analysis to evaluate the hazard ratio of treatment modalities. <sup>b</sup> No patients are excluded, and the total number is 596. <sup>c</sup> Confounding factors (including year of diagnosis, primary site, histology, metastasis to the liver, metastasis to the lung, metastasis to the bone, metastasis to the brain) were adjusted in multivariable Cox proportional hazards regression analysis to evaluate the hazard ratio of treatment modalities. <sup>d</sup> 16 patients died of unknown causes are excluded and the total number is 580.
