# Supplementary material for: Palliative Gastrectomy Improves the Survival of Patients with Metastatic Early-Onset Gastric Cancer: A Retrospective Cohort Study
Source: MDPI journal article supplement (doi:10.3390/curroncol30090572), 2023-08-27
Supplement: s1 [file s1]

Supplemental Table S1: Prognostic factors for cause- specific survival

| Variable                             | Univariable Cox regression analysis <sup>a</sup> |             |              | Multivariable Cox regression analysis <sup>b</sup> |              |              |
|--------------------------------------|--------------------------------------------------|-------------|--------------|----------------------------------------------------|--------------|--------------|
|                                      | Hazard ratio                                     | 95% CI      | P value      | Hazard ratio                                       | 95% CI       | P value      |
| Age, year                            | 1.001                                            | 0.988-1.015 | 0.862        |                                                    |              |              |
| Male sex                             | 0.935                                            | 0.779-1.121 | 0.465        |                                                    |              |              |
| Race                                 |                                                  |             |              |                                                    |              |              |
| White                                | reference                                        |             |              |                                                    |              |              |
| Black                                | 0.976                                            | 0.755-1.262 | 0.853        |                                                    |              |              |
| American Indian/Alaska Native        | 1.485                                            | 0.702-3.141 | 0.301        |                                                    |              |              |
| Asian or Pacific Islander            | 0.841                                            | 0.662-1.069 | 0.157        |                                                    |              |              |
| Unknown                              | 0.426                                            | 0.106-1.715 | 0.230        |                                                    |              |              |
| Marital status                       |                                                  |             |              |                                                    |              |              |
| Married                              | reference                                        |             |              |                                                    |              |              |
| Single                               | 0.869                                            | 0.707-1.069 | 0.185        |                                                    |              |              |
| Divorced/Widowed/Separated           | 0.858                                            | 0.632-1.165 | 0.326        |                                                    |              |              |
| Unknown                              | 1.016                                            | 0.604-1.710 | 0.951        |                                                    |              |              |
| Year of diagnosis                    | 0.966                                            | 0.945-0.987 | <b>0.002</b> | 0.974                                              | 0.932-1.017  | 0.232        |
| Primary site                         |                                                  |             |              |                                                    |              |              |
| Cardia                               | reference                                        |             |              | reference                                          |              |              |
| Non- cardia                          | 1.412                                            | 1.097-1.817 | <b>0.007</b> | 1.323                                              | 1.006-1.740  | <b>0.045</b> |
| Overlapping lesion of stomach        | 1.491                                            | 1.074-2.072 | <b>0.017</b> | 1.360                                              | 0.960-1.926  | 0.084        |
| Unknown                              | 1.606                                            | 1.176-2.193 | <b>0.003</b> | 1.455                                              | 1.044-2.026  | <b>0.027</b> |
| Tumor differentiation grade          |                                                  |             |              |                                                    |              |              |
| I/II                                 | reference                                        |             |              |                                                    |              |              |
| III/IV                               | 1.309                                            | 0.993-1.726 | 0.056        |                                                    |              |              |
| Unknown                              | 1.080                                            | 0.738-1.580 | 0.692        |                                                    |              |              |
| Histology                            |                                                  |             |              |                                                    |              |              |
| Signet ring cell carcinoma           | reference                                        |             |              | reference                                          |              |              |
| Other adenocarcinoma                 | 0.810                                            | 0.674-0.974 | <b>0.025</b> | 0.848                                              | 0.697-1.031  | 0.097        |
| Non- adenocarcinoma                  | 0.608                                            | 0.384-0.963 | <b>0.034</b> | 0.585                                              | 0.359-0.951  | <b>0.030</b> |
| Tumor size                           |                                                  |             |              |                                                    |              |              |
| ≤5 cm                                | reference                                        |             |              |                                                    |              |              |
| >5 cm                                | 1.012                                            | 0.814-1.258 | 0.915        |                                                    |              |              |
| Unknown                              | 1.120                                            | 0.894-1.404 | 0.323        |                                                    |              |              |
| T stage                              |                                                  |             |              |                                                    |              |              |
| T1/ T2                               | reference                                        |             |              |                                                    |              |              |
| T3/ T4                               | 1.310                                            | 0.922-1.861 | 0.131        |                                                    |              |              |
| Tx                                   | 1.319                                            | 0.821-2.118 | 0.252        |                                                    |              |              |
| Metastasis to the liver <sup>b</sup> |                                                  |             |              |                                                    |              |              |
| No                                   | reference                                        |             |              | reference                                          |              |              |
| Yes                                  | 1.174                                            | 0.835-1.651 | 0.355        | 1.158                                              | 0.801-1.674  | 0.436        |
| Unknown                              | 1.357                                            | 1.122-1.643 | <b>0.002</b> | 0.846                                              | 0.088-8.108  | 0.884        |
| Metastasis to the lung <sup>b</sup>  | reference                                        |             |              | reference                                          |              |              |
| No                                   | 2.024                                            | 1.071-3.823 | <b>0.030</b> | 3.308                                              | 1.669-6.557  | <b>0.001</b> |
| Yes                                  | 1.359                                            | 1.133-1.630 | <b>0.001</b> | 2.393                                              | 0.334-17.134 | 0.385        |
| Unknown                              |                                                  |             |              |                                                    |              |              |
| Metastasis to the bone <sup>b</sup>  |                                                  |             |              |                                                    |              |              |
| No                                   | reference                                        |             |              |                                                    |              |              |
| Yes                                  | 1.607                                            | 0.898-2.878 | 0.110        | 1.750                                              | 0.962-3.181  | 0.067        |
| Unknown                              | 1.345                                            | 1.121-1.613 | <b>0.001</b> | 0.528                                              | 0.160-1.743  | 0.295        |
| Metastasis to the brain <sup>b</sup> |                                                  |             |              |                                                    |              |              |
| No                                   | reference                                        |             |              |                                                    |              |              |

|                         |           |              |                  |           |             |                  |
|-------------------------|-----------|--------------|------------------|-----------|-------------|------------------|
| Yes                     | 4.836     | 1.538-15.208 | <b>0.007</b>     | 4.369     | 1.36-14.036 | <b>0.013</b>     |
| Unknown                 | 1.332     | 1.112-1.594  | <b>0.002</b>     | --        | --          | --               |
| Receipt of surgery      |           |              |                  |           |             |                  |
| No                      | reference |              |                  | reference |             |                  |
| Yes                     | 0.492     | 0.411-0.590  | <b>&lt;0.001</b> | 0.462     | 0.383-0.558 | <b>&lt;0.001</b> |
| Receipt of radiation    |           |              |                  |           |             |                  |
| No                      | reference |              |                  |           |             |                  |
| Yes                     | 0.930     | 0.758-1.142  | 0.491            |           |             |                  |
| Receipt of chemotherapy |           |              |                  |           |             |                  |
| No                      | reference |              |                  | reference |             |                  |
| Yes                     | 0.719     | 0.58-0.891   | <b>0.003</b>     | 0.655     | 0.522-0.823 | <b>&lt;0.001</b> |

CI= confidence interval. P values in bold indicate <0.05 and are considered as statistically significant. <sup>a</sup> 16 patients died of unknown causes are excluded in this analysis. <sup>b</sup> Confounding factors (including year of diagnosis, primary site, tumor differentiation grade, histology, site of metastasis, receipt of surgery, receipt of chemotherapy) were adjusted in multivariable Cox proportional hazards regression analysis. <sup>c</sup> The site of metastasis was only accessible for patients diagnosed after 2010, while the site of metastasis of patients diagnosed before 2010 was recorded as unknown.
