# Supplementary material for: Palliative Gastrectomy Improves the Survival of Patients with Metastatic Early-Onset Gastric Cancer: A Retrospective Cohort Study
Source: Curr Oncol. 2023 Aug 27;30(9):7874–90. doi: 10.3390/curroncol30090572 (PMC10527682; doi:10.3390/curroncol30090572)
Supplement: Supplementary file 1 [file curroncol-30-00572-s001.zip]

Archive with 4 entries (4 files):
- Supplemental figure S1.png
- Supplemental figure S2.png
- Supplemental Table S1 Cox_cancer_cause.pdf
- Supplemental Table S2 The effect of treatment modalities on overall survival and cancer-specific survival.pdf
